# Supplementary material for: Effect of melt and solution electrospinning on the formation and structure of poly(vinylidene fluoride) fibres
Source: Royal Society of Chemistry journal article supplement (doi:10.1039/c7ra01299c), 2017-01-01
Supplement: c7ra01299c1.pdf [file c7ra01299c1.pdf]

## Supporting Information for Effect of melt and solution electrospinning on the formation and structure of poly(vinylidene fluoride) fibres

Hanako Asai,\* Marina Kikuchi, Naoki Shimada and Koji Nakane

Frontier Fiber Technology and Science, Graduate School of Engineering, University of Fukui, 3-9-1  
Bunkyo, Fukui, 910-8507, Japan

E-mail: h\_asai@u-fukui.ac.jp

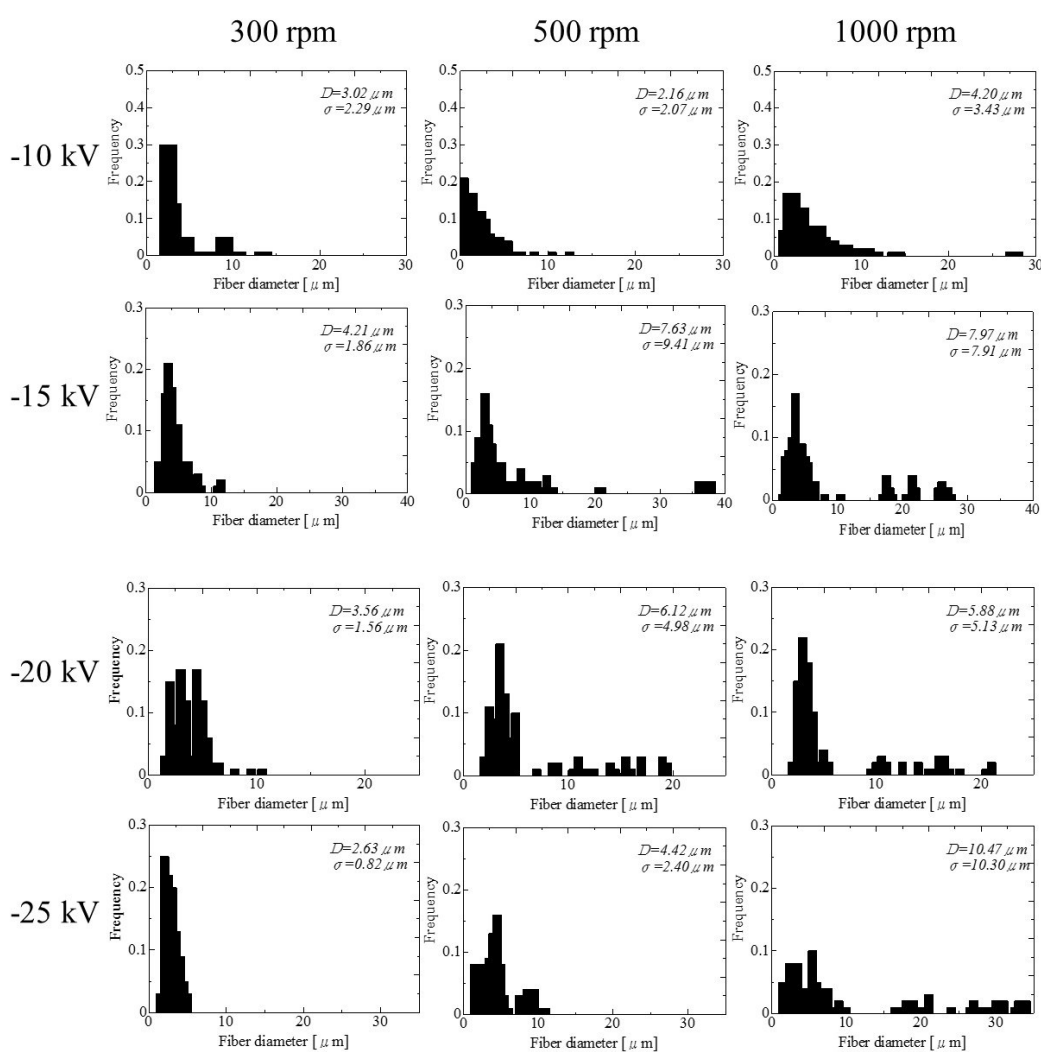

Fig.S1 Histograms for the diameters of the M-ES fibres.

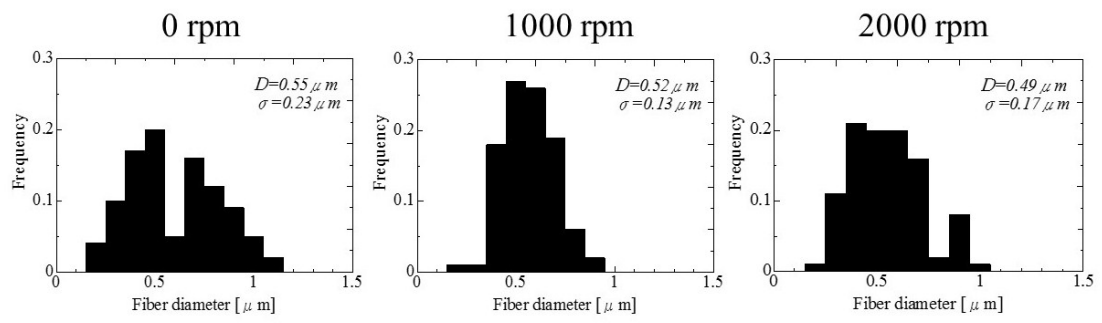

**Fig.S2** Histograms for the diameters S-ES fibres.
